# Supplementary material
Source: publisher figshare collection journal article supplement (https://tandf.figshare.com/ndownloader/files/33172795)
Supplement: Supplementary file 1 [file 33172795]

Appendix

C

A

B

Figure A1. Groundwater level contour maps for the midstream, downstream and coastal areas of Wadi Zabid, obtained by kriging interpolation method: (A) in 1987, based on the well inventory by DHV (1988); (B) in 2008, based on the well inventory by NWRA (2008); and (C) in 2016, based on the field survey data of Al-Qubatee (2016).
